# Supplementary material for: Novel ratiometric electrochemical sensing platform for uric acid based on electroactive cuprous oxide nanocubes combined with boron carbide
Source: Royal Society of Chemistry journal article supplement (doi:10.1039/d2an01270g), 2022-01-01
Supplement: d2an01270g1.pdf [file d2an01270g1.pdf]

## Supporting Information

**A novel ratiometric electrochemical sensing platform for uric acid based on electroactive cuprous oxide nanocubes combined with boron carbide**

Dan Cheng, Xiang Liu, Peipei Li, Youyu Zhang, Meiling Liu,\*Shouzhuo Yao

*Key Laboratory of Chemical Biology & Traditional Chinese Medicine Research  
(Ministry of Education, China), College of Chemistry and Chemical Engineering,  
Hunan Normal University, Changsha 410081, P. R. China*

---

\* Corresponding author

E-mail                      address:                      liumeilingww@126.com;                      liuml@hunnu.edu.cn

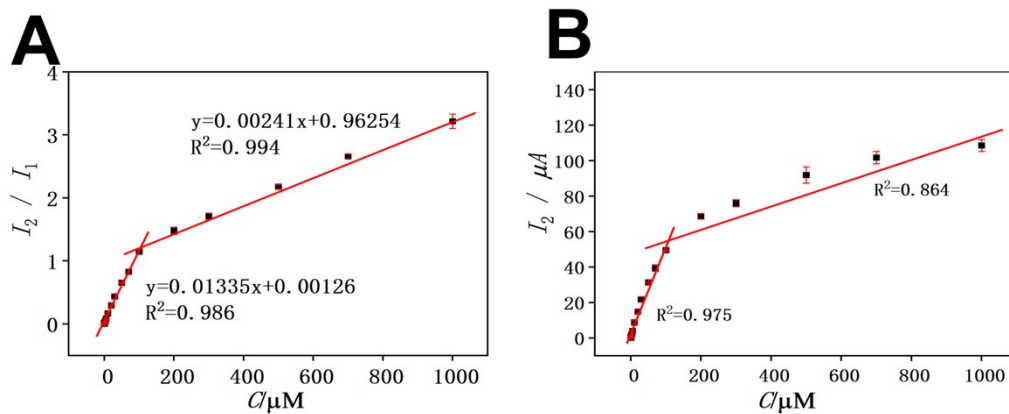

**Figure S1.** Corresponding calibration curves describing the relationships between (A) the ratio of the peak current [ $I_2/I_1$ ] or (B) single signal  $I_2$  with the UA concentration [C]
